# Supplementary material
Source: MDPI journal article supplement (https://www.mdpi.com/2077-1312/7/11/412)

## Supplementary information

**Supplementary Figure 1 (Fig. S1)** - Mean water temperature (A, B, C), salinity (D, E, F) for Minho estuary in the summer season for the different scenarios.

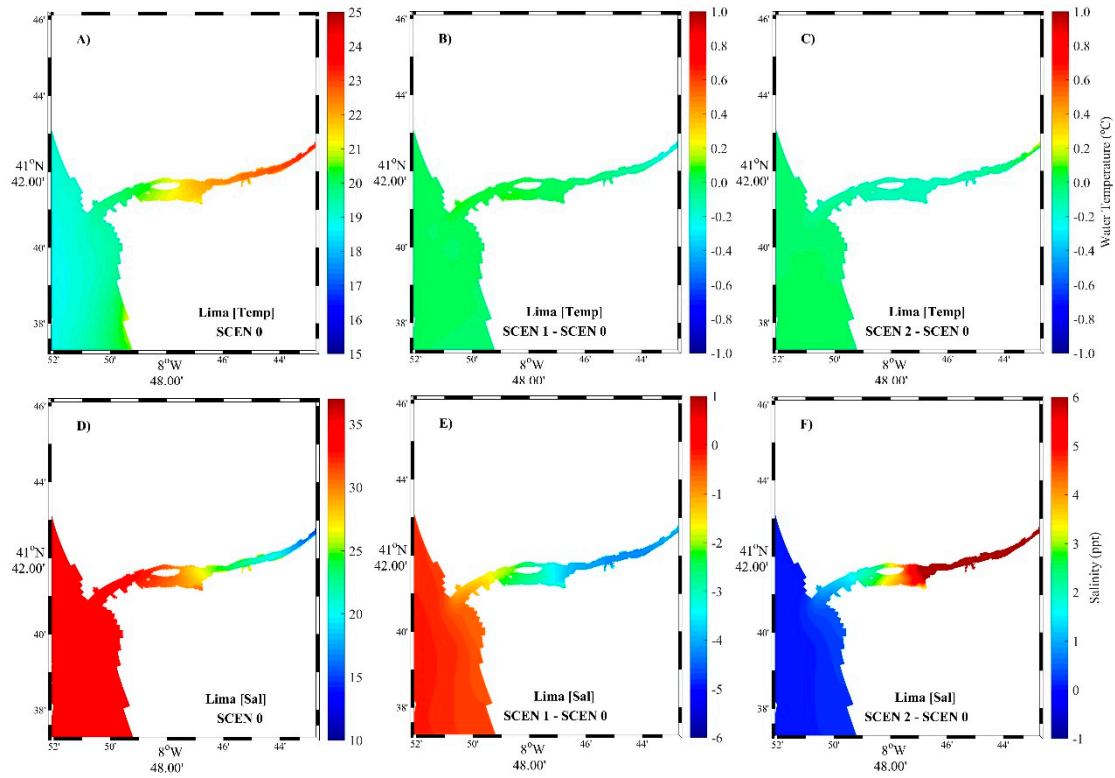

**Supplementary Figure 2 (Fig. S2)** - Mean water temperature (A, B, C), salinity (D, E, F) for Lima estuary in the summer season for the different scenarios.

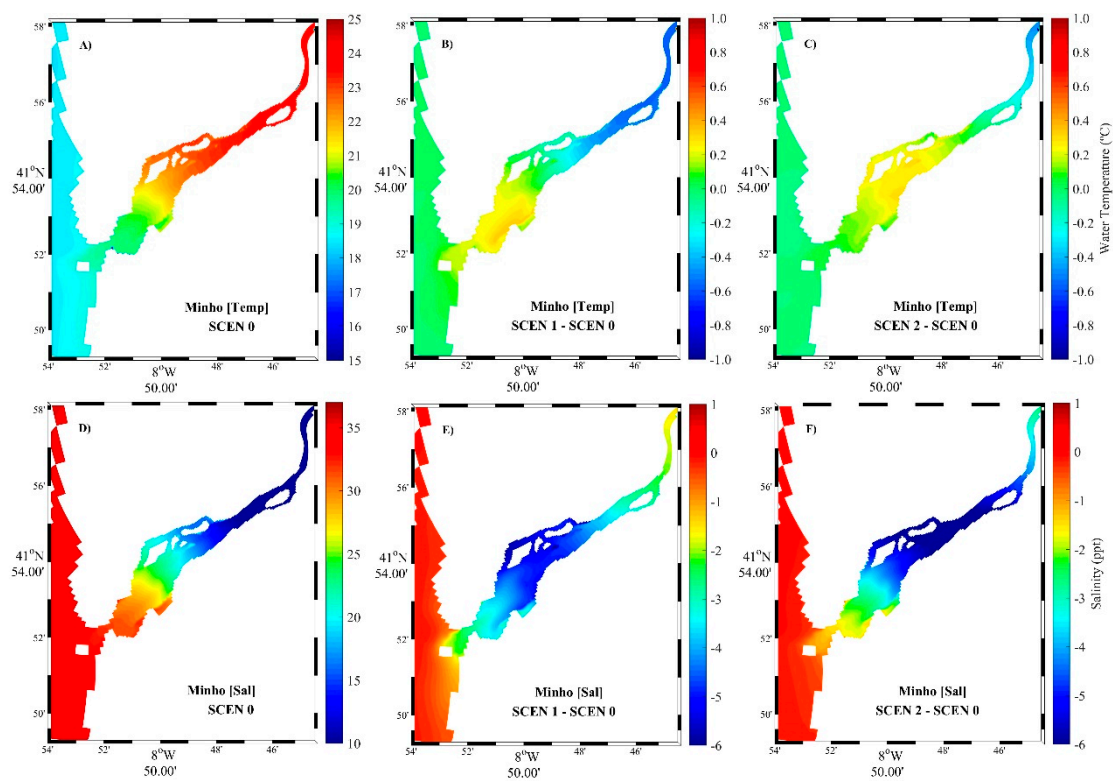

**Supplementary Figure 3 (Fig. S3)** - Mean water temperature (A, B, C), salinity (D, E, F) for Minho estuary in the winter season for the different scenarios.

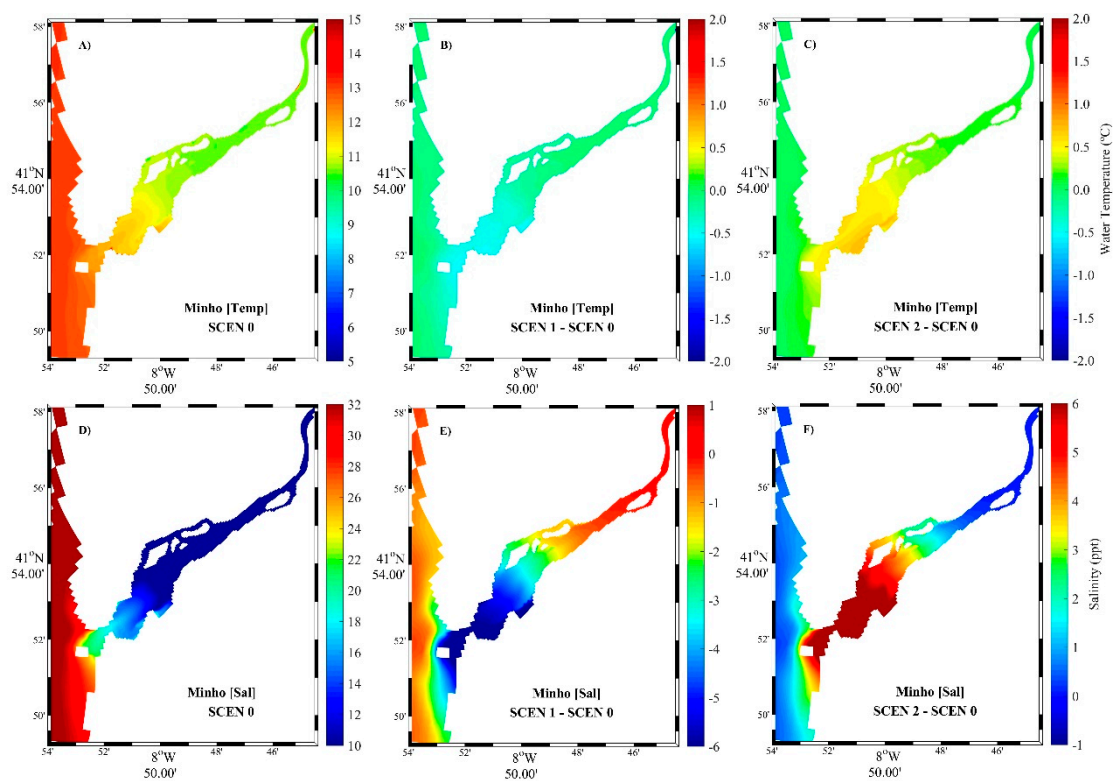

**Supplementary Figure 4 (Fig. S4)** - Mean water temperature (A, B, C), salinity (D, E, F) for Lima estuary in the winter season for the different scenarios.

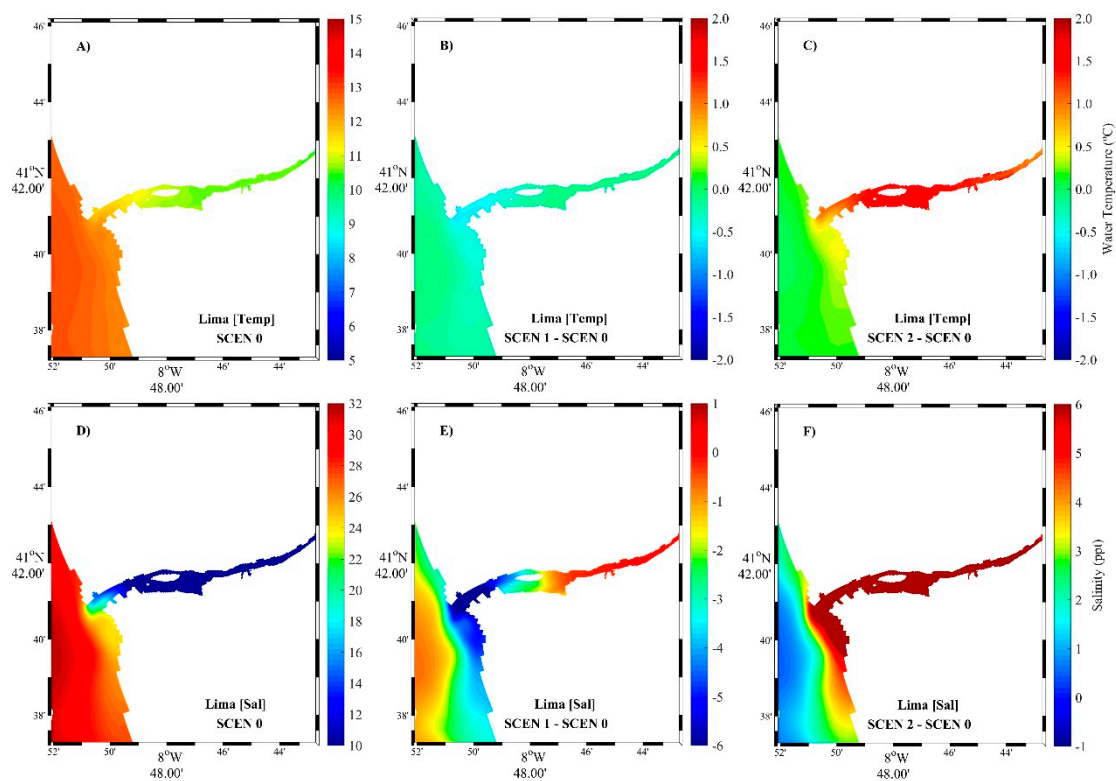

Supplement: s1 [file s1]
